# Supplementary material
Source: MDPI journal article supplement (https://www.mdpi.com/2311-7524/9/9/972)

sequence1 OR227935.1:1-157902

Alignment 1  
sequence2  
OR227937.1 (+)  
1-157559  
Criteria: 70%, 100 bp  
Regions: 289

Alignment 2  
sequence3  
OR227936.1 (+)  
1-157450  
Criteria: 70%, 100 bp  
Regions: 288

Alignment 3  
sequence4  
MH191388.1 (+)  
1-157298  
Criteria: 70%, 100 bp  
Regions: 293

Alignment 4  
sequence5  
NC\_062156.1 (+)  
3-157848  
Criteria: 70%, 100 bp  
Regions: 287

Alignment 5  
sequence6  
MN496075.1 (+)  
1-157715  
Criteria: 70%, 100 bp  
Regions: 286

Alignment 6  
sequence7  
MT081309.1 (+)  
1-157152  
Criteria: 70%, 100 bp  
Regions: 291

Alignment 7  
sequence8  
MN496076.1 (+)  
1-157781  
Criteria: 70%, 100 bp  
Regions: 286

X-axis: sequence1  
Resolution: 39  
Window size: 100 bp

- gene
- exon
- UTR
- CNS
- mRNA

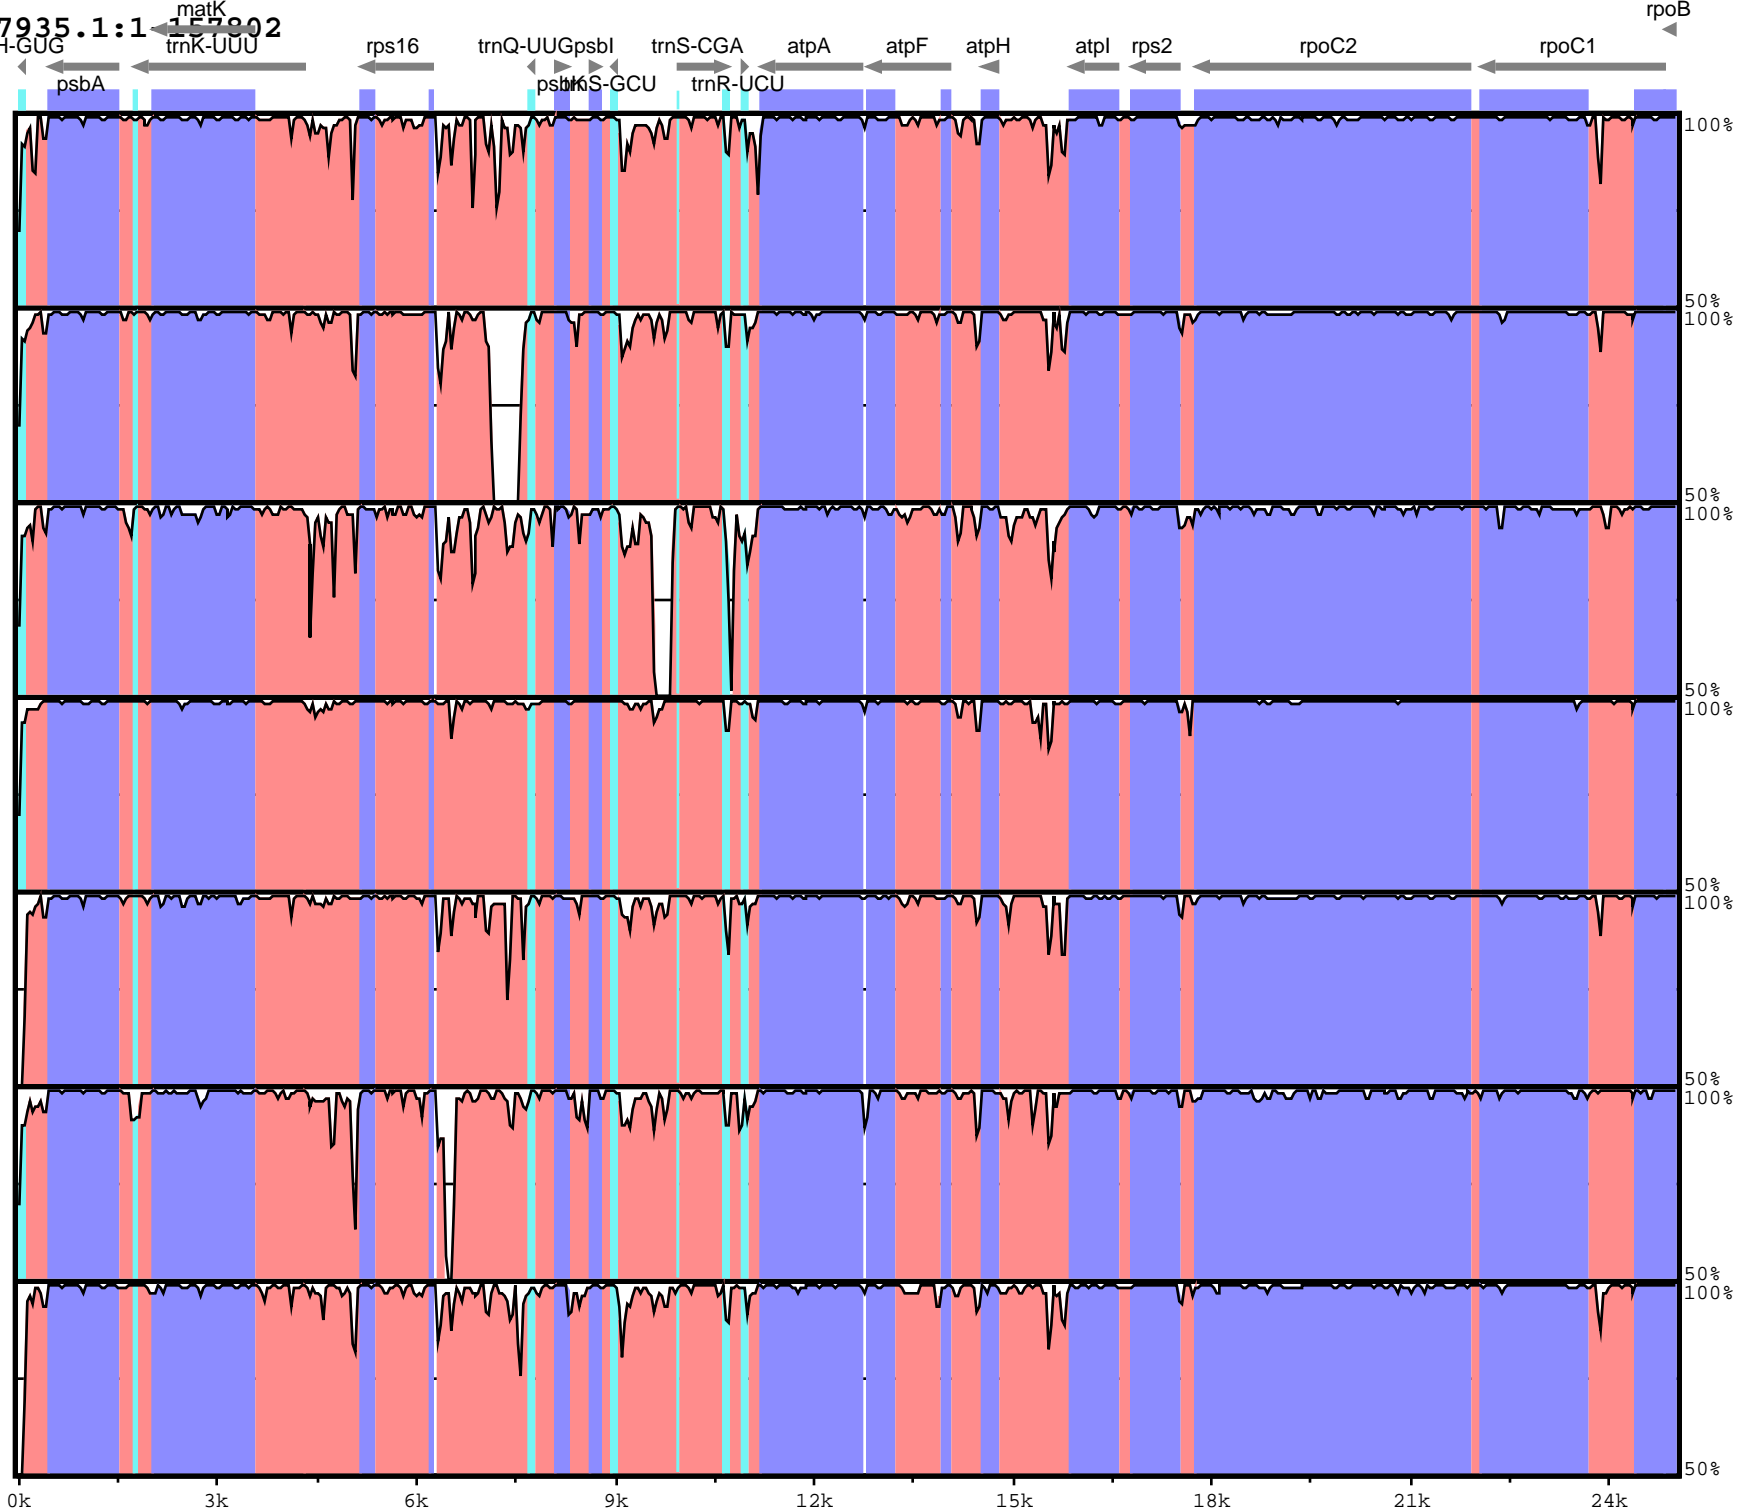

sequence1 OR227935.1:1-157802

Alignment 1  
sequence2  
OR227937.1 (+)  
1-157559  
Criteria: 70%, 100 bp  
Regions: 289

Alignment 2  
sequence3  
OR227936.1 (+)  
1-157450  
Criteria: 70%, 100 bp  
Regions: 288

Alignment 3  
sequence4  
MH191388.1 (+)  
1-157298  
Criteria: 70%, 100 bp  
Regions: 293

Alignment 4  
sequence5  
NC\_062156.1 (+)  
3-157848  
Criteria: 70%, 100 bp  
Regions: 287

Alignment 5  
sequence6  
MN496075.1 (+)  
1-157715  
Criteria: 70%, 100 bp  
Regions: 286

Alignment 6  
sequence7  
MT081309.1 (+)  
1-157152  
Criteria: 70%, 100 bp  
Regions: 291

Alignment 7  
sequence8  
MN496076.1 (+)  
1-157781  
Criteria: 70%, 100 bp  
Regions: 286

X-axis: sequence1  
Resolution: 39  
Window size: 100 bp

- gene
- exon
- UTR
- CNS
- mRNA

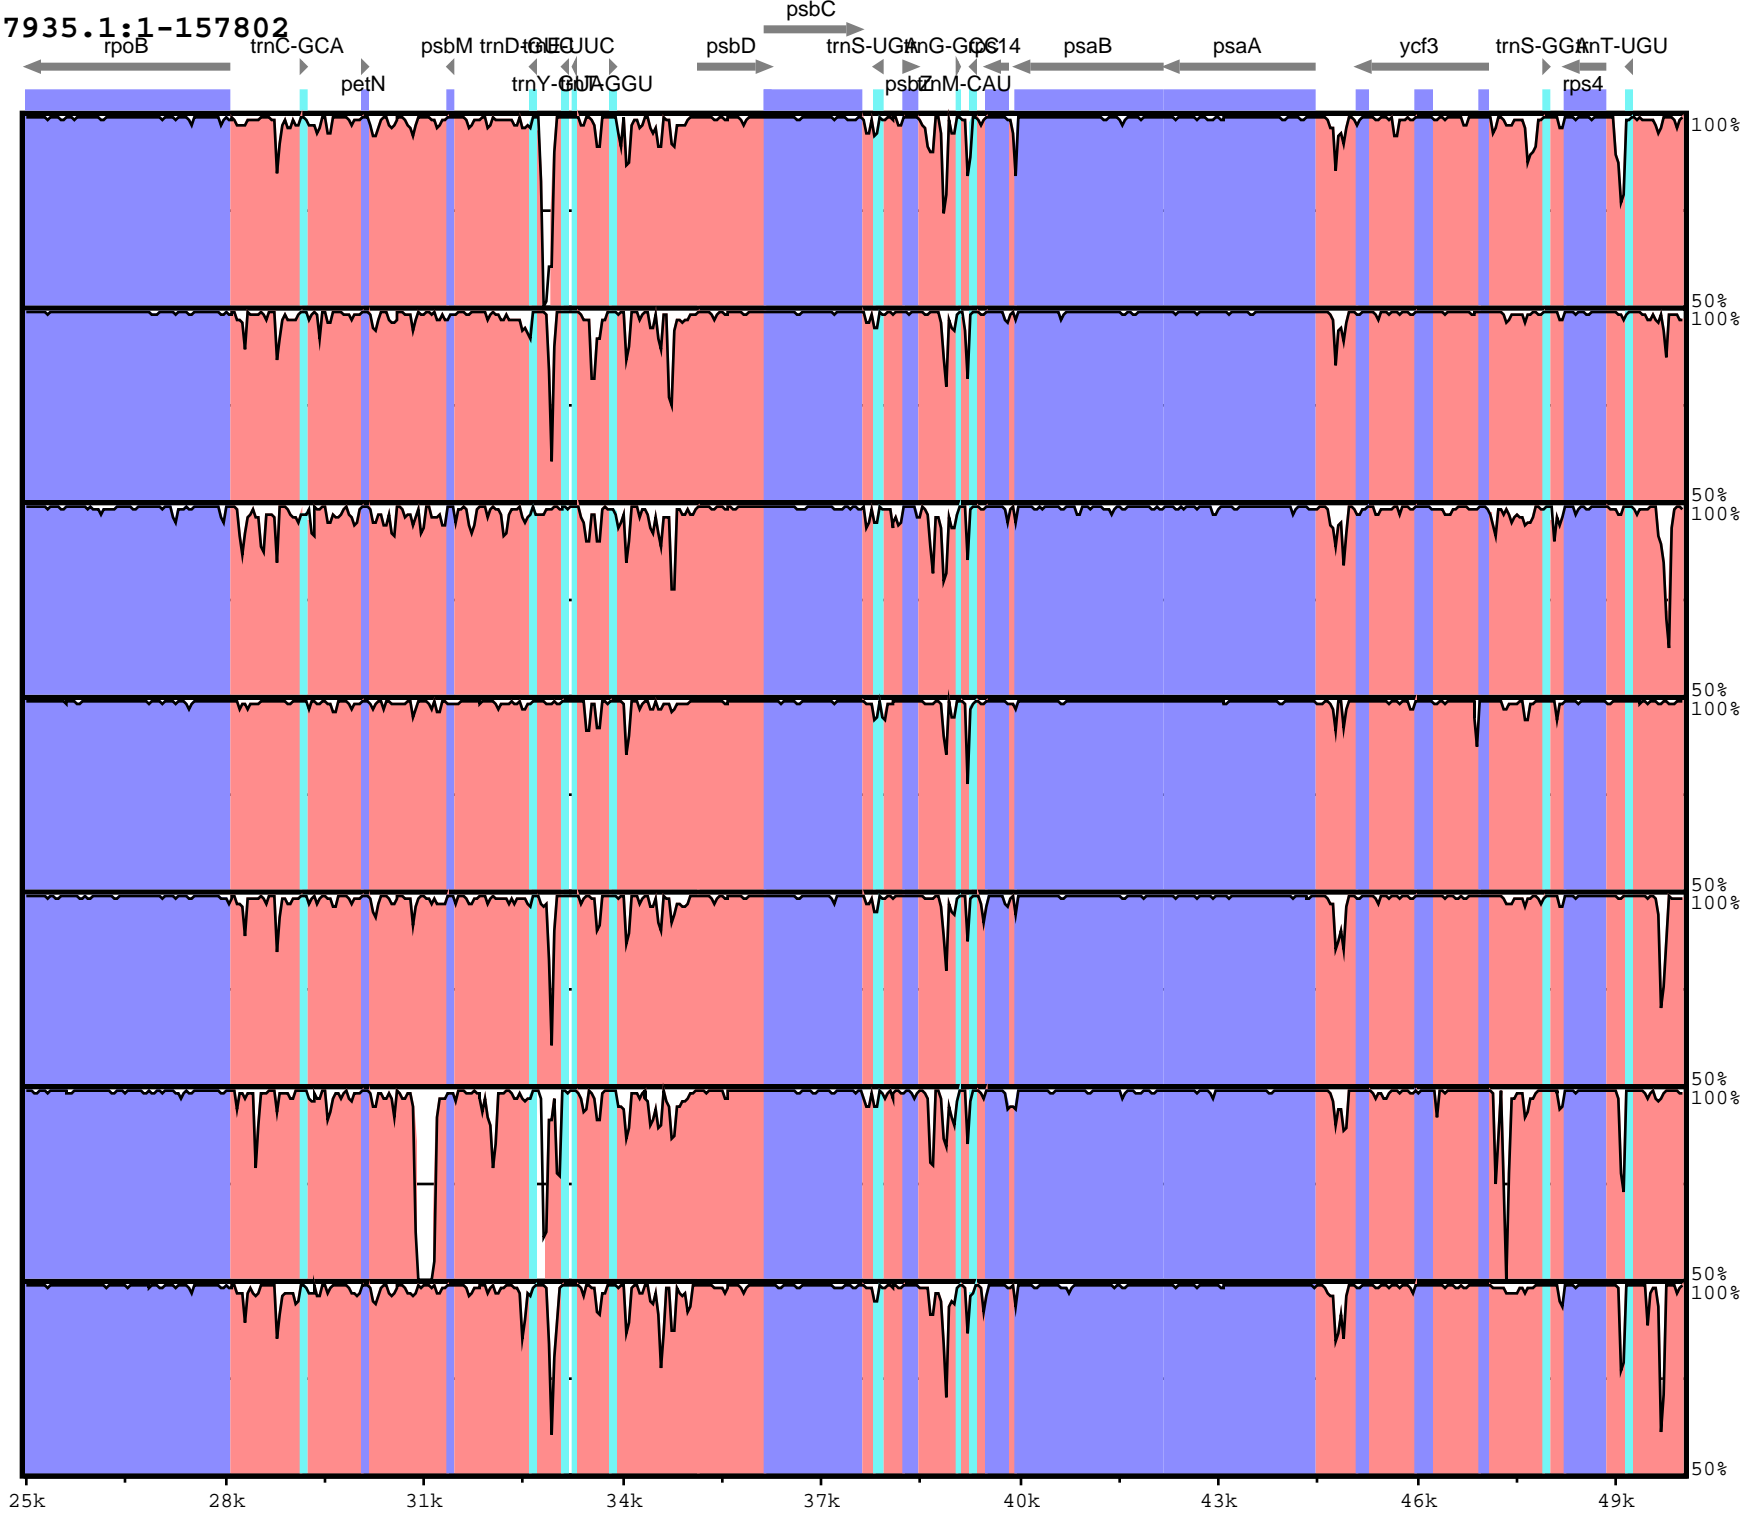

sequence1 OR227935.1:1-157802

Alignment 1  
sequence2  
OR227937.1 (+)  
1-157559  
Criteria: 70%, 100 bp  
Regions: 289

Alignment 2  
sequence3  
OR227936.1 (+)  
1-157450  
Criteria: 70%, 100 bp  
Regions: 288

Alignment 3  
sequence4  
MH191388.1 (+)  
1-157298  
Criteria: 70%, 100 bp  
Regions: 293

Alignment 4  
sequence5  
NC\_062156.1 (+)  
3-157848  
Criteria: 70%, 100 bp  
Regions: 287

Alignment 5  
sequence6  
MN496075.1 (+)  
1-157715  
Criteria: 70%, 100 bp  
Regions: 286

Alignment 6  
sequence7  
MT081309.1 (+)  
1-157152  
Criteria: 70%, 100 bp  
Regions: 291

Alignment 7  
sequence8  
MN496076.1 (+)  
1-157781  
Criteria: 70%, 100 bp  
Regions: 286

X-axis: sequence1  
Resolution: 39  
Window size: 100 bp

- gene
- exon
- UTR
- CNS
- mRNA

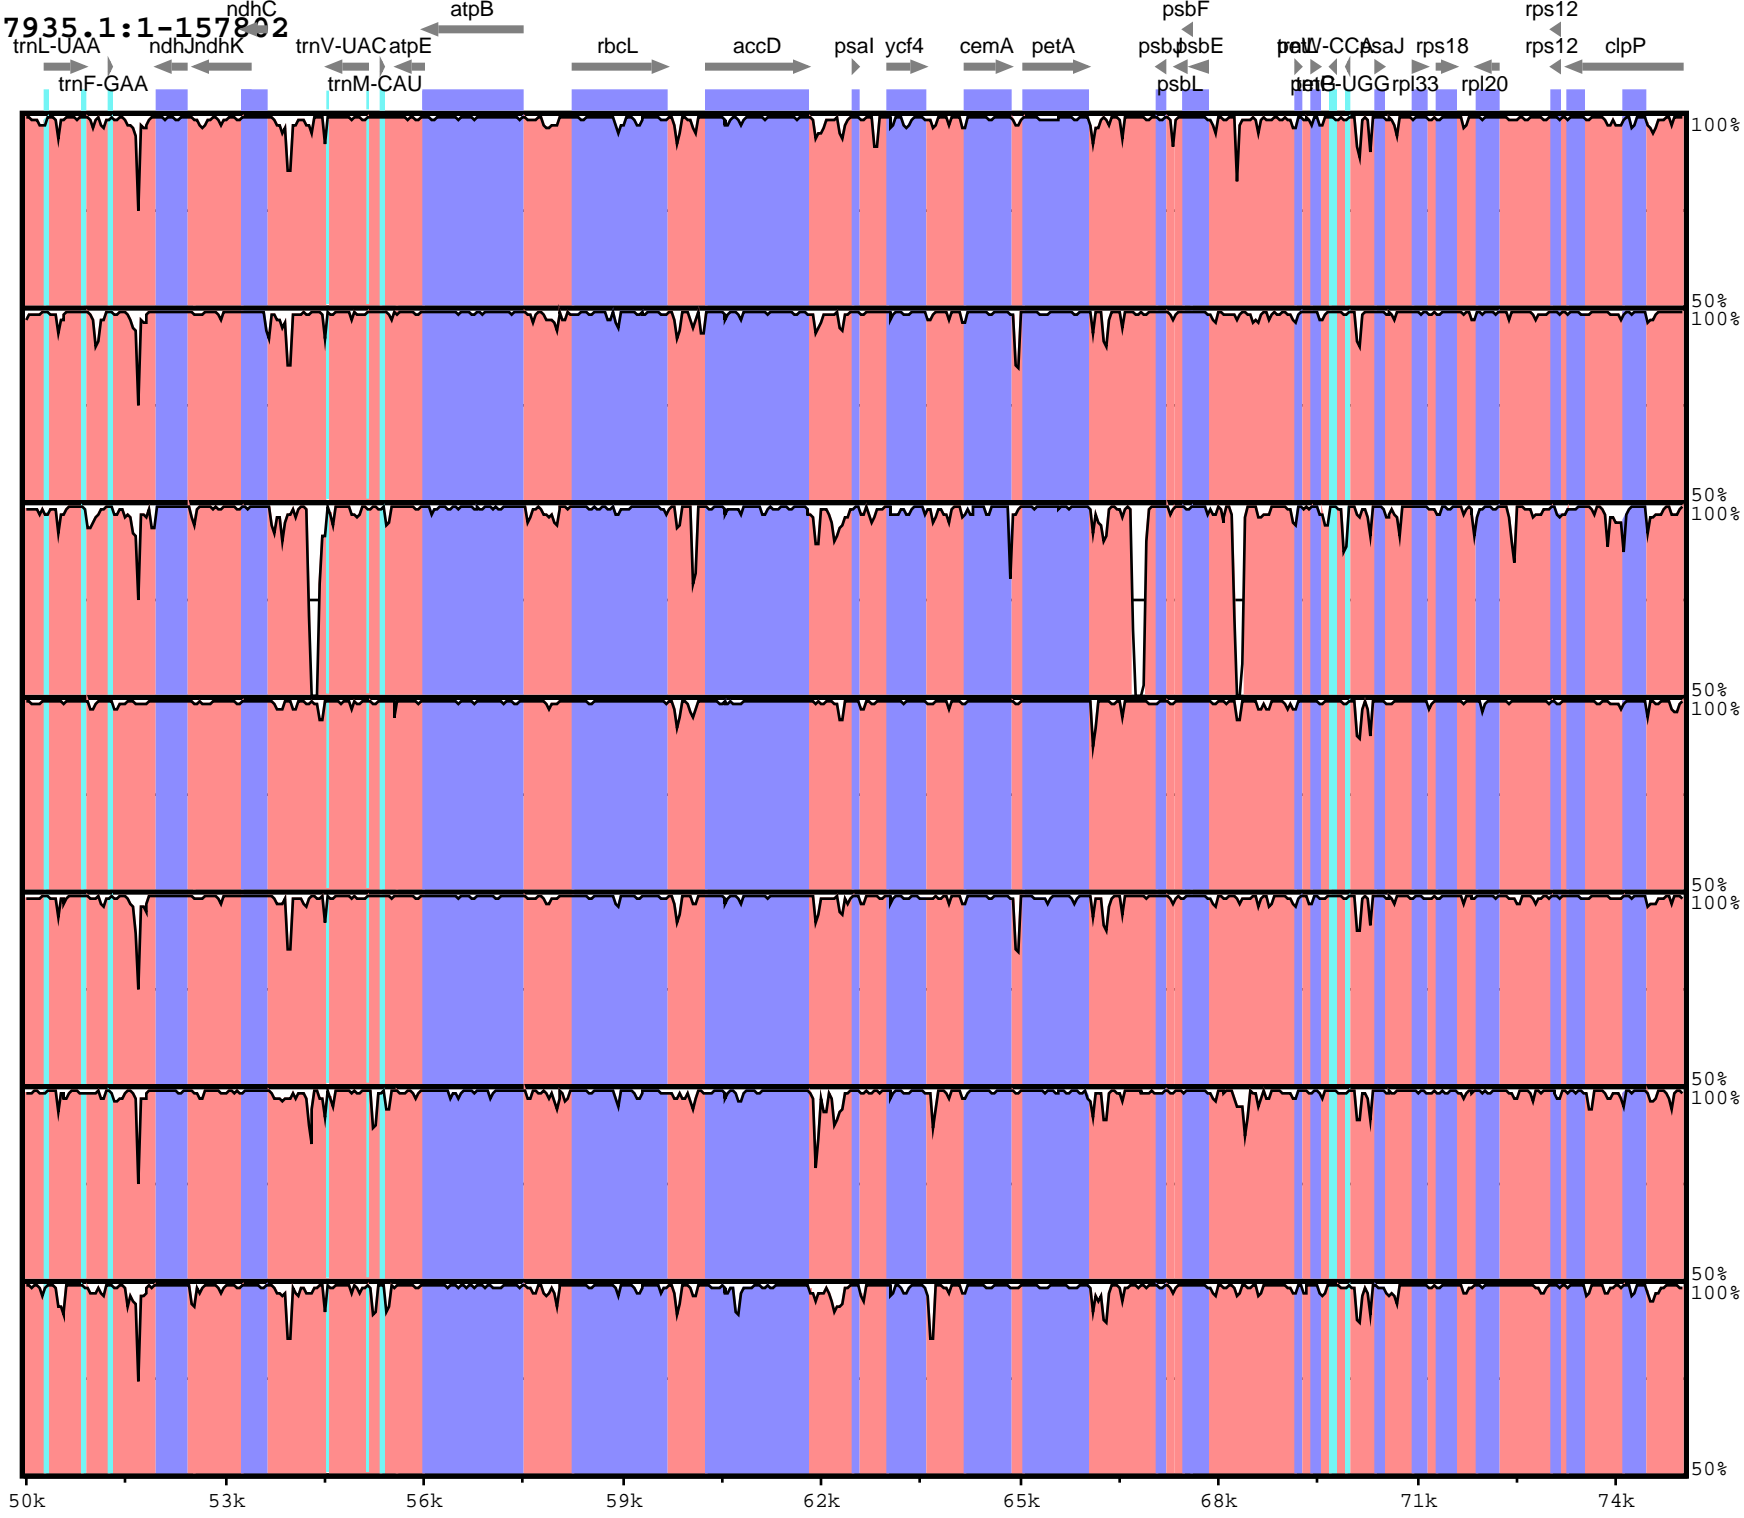

**sequence1 OR227935.1:1-157802**

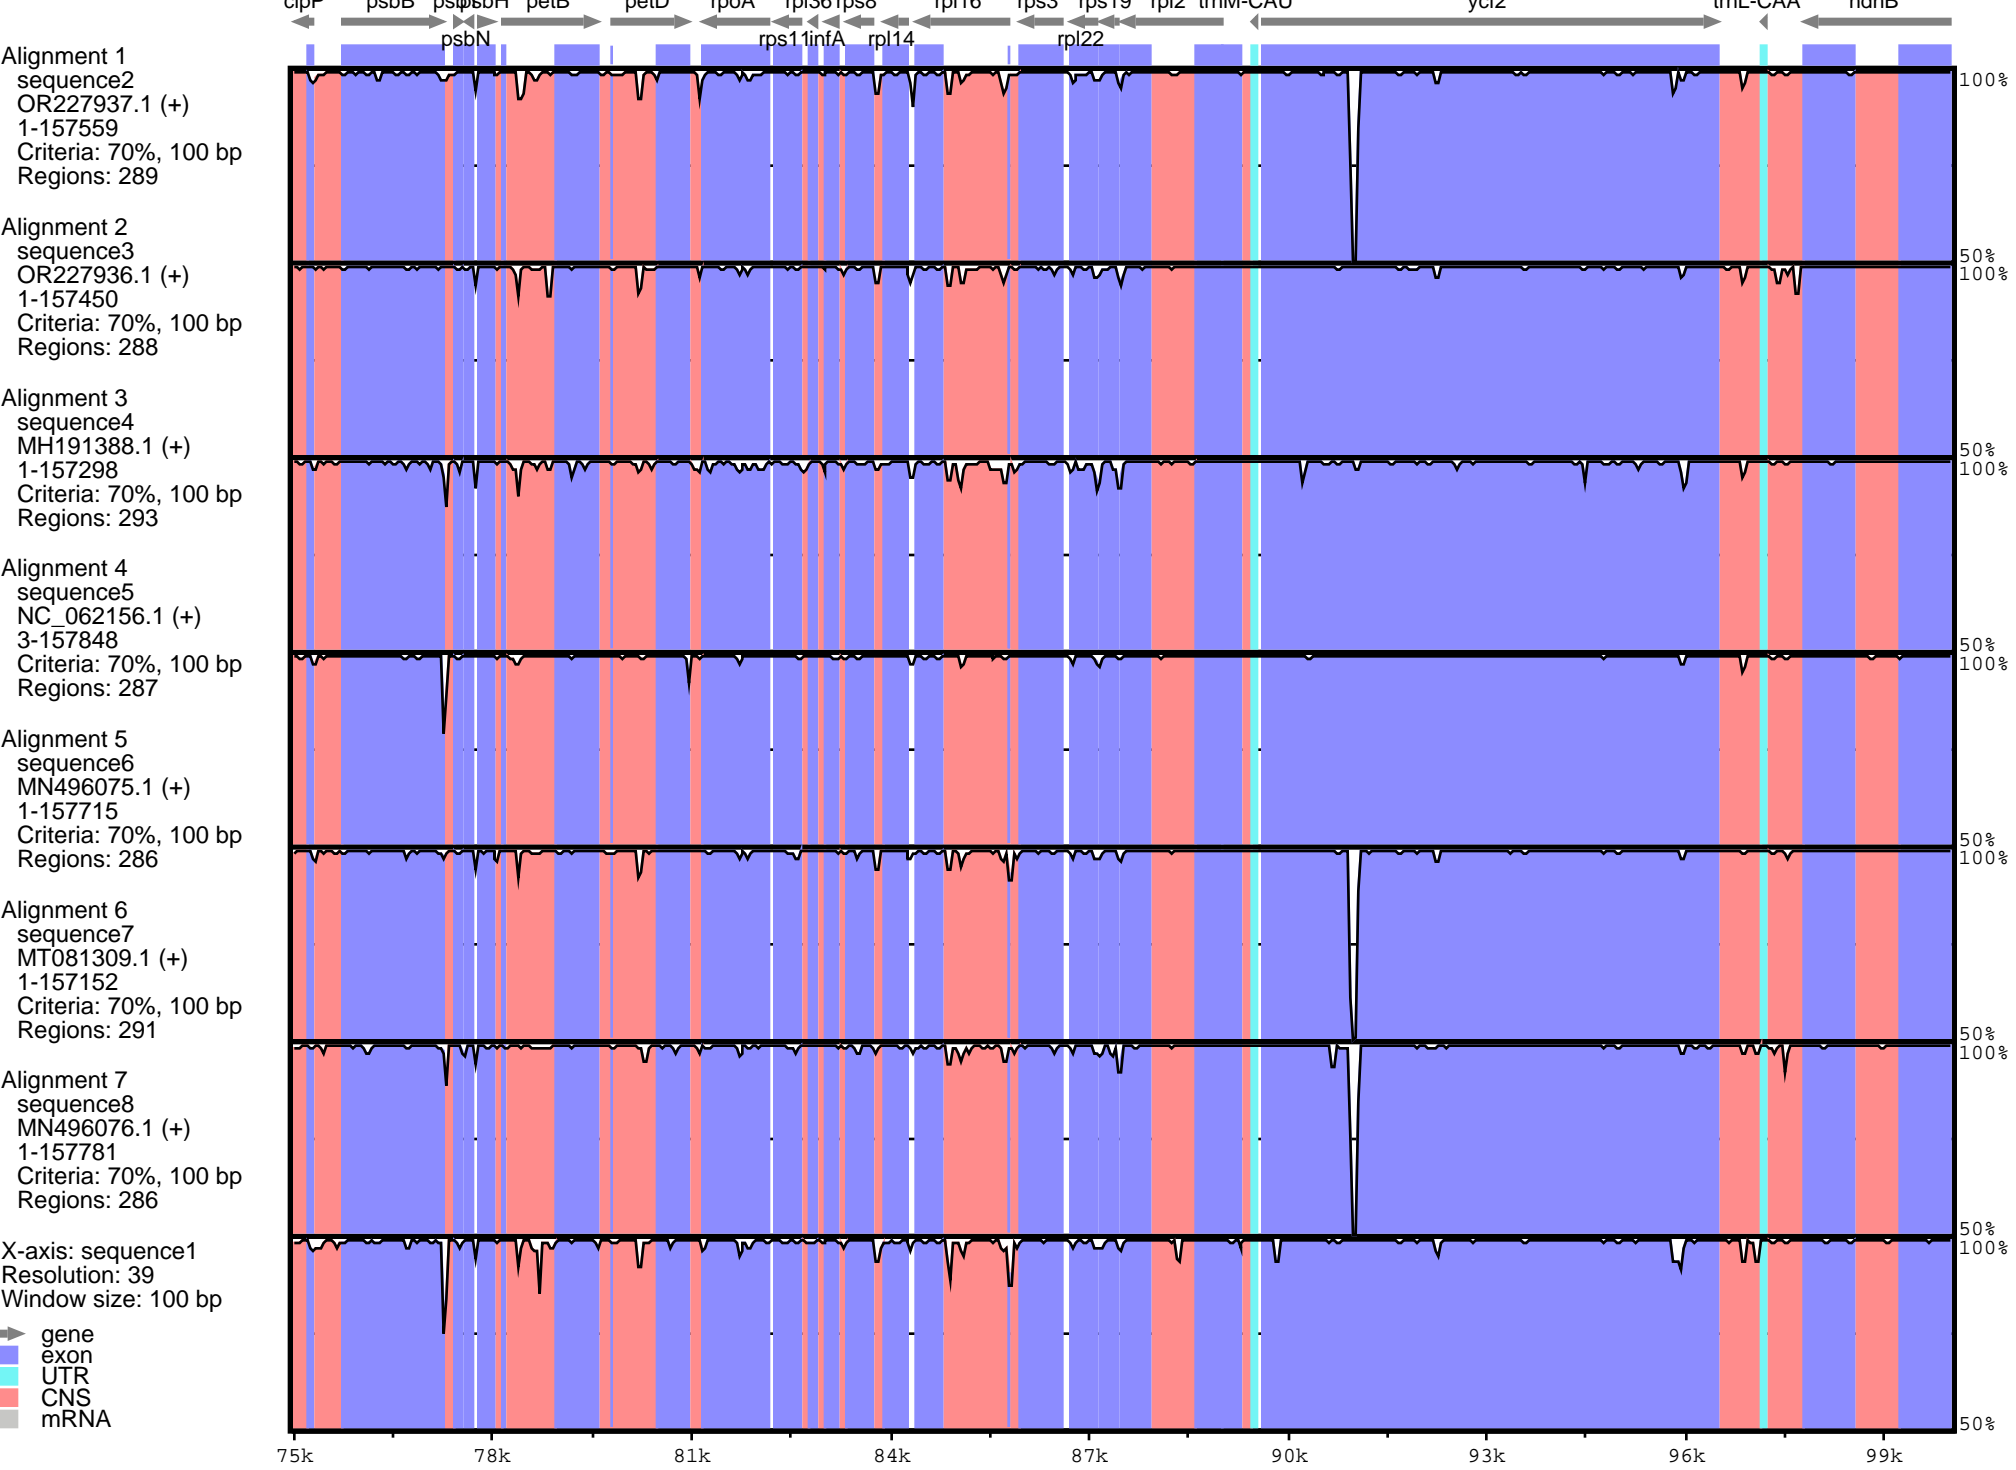

**sequence1 OR227935.1:1-157802**

Alignment 1  
sequence2  
OR227937.1 (+)  
1-157559  
Criteria: 70%, 100 bp  
Regions: 289

Alignment 2  
sequence3  
OR227936.1 (+)  
1-157450  
Criteria: 70%, 100 bp  
Regions: 288

Alignment 3  
sequence4  
MH191388.1 (+)  
1-157298  
Criteria: 70%, 100 bp  
Regions: 293

Alignment 4  
sequence5  
NC\_062156.1 (+)  
3-157848  
Criteria: 70%, 100 bp  
Regions: 287

Alignment 5  
sequence6  
MN496075.1 (+)  
1-157715  
Criteria: 70%, 100 bp  
Regions: 286

Alignment 6  
sequence7  
MT081309.1 (+)  
1-157152  
Criteria: 70%, 100 bp  
Regions: 291

Alignment 7  
sequence8  
MN496076.1 (+)  
1-157781  
Criteria: 70%, 100 bp  
Regions: 286

X-axis: sequence1  
Resolution: 39  
Window size: 100 bp

- gene
- exon
- UTR
- CNS
- mRNA

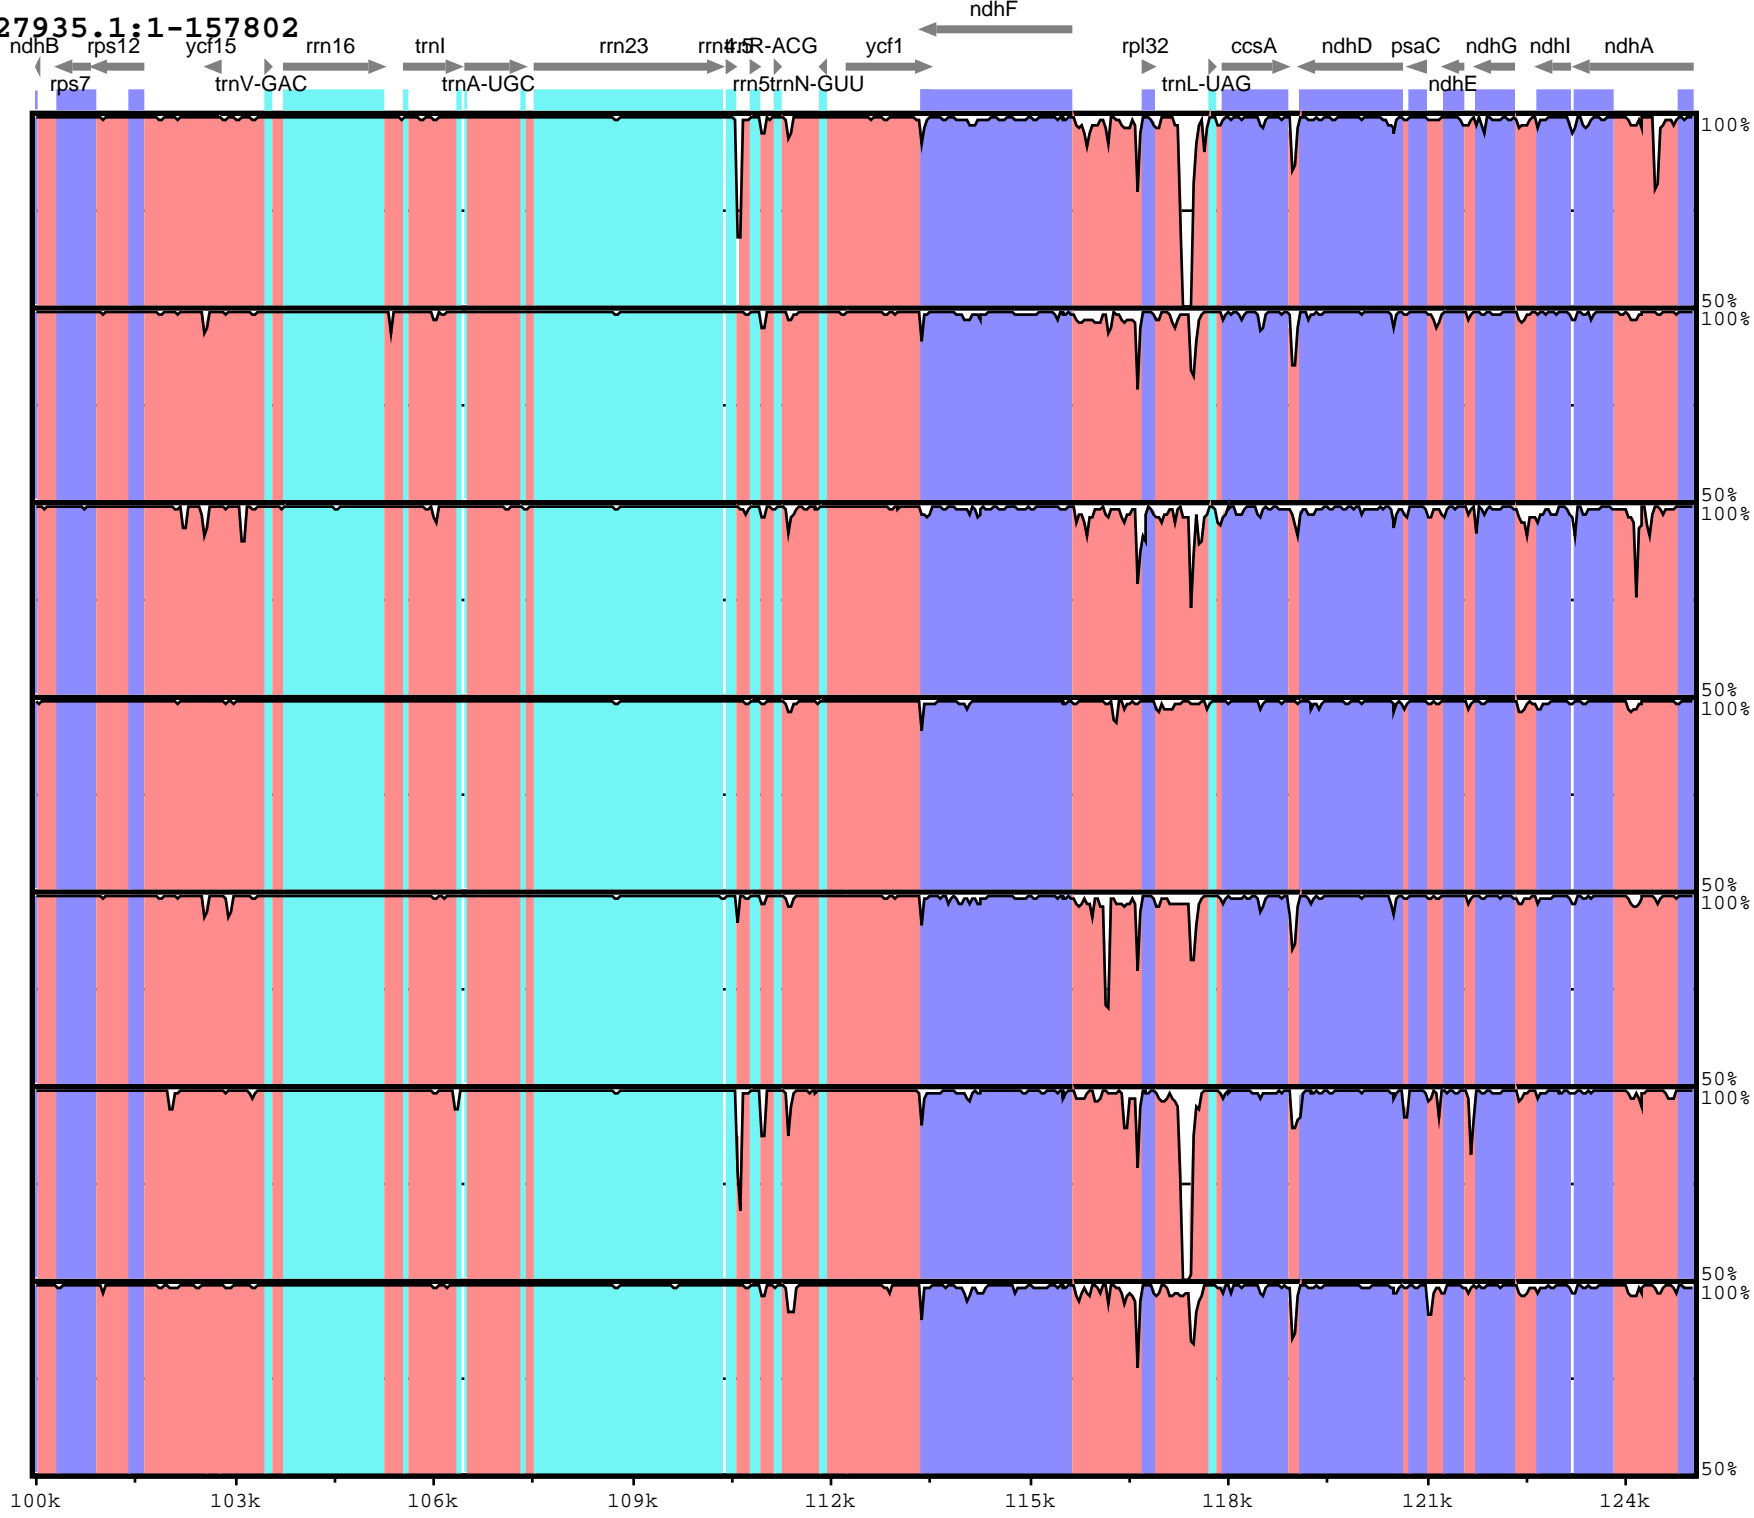

**sequence1 OR227935.1 1-157802**

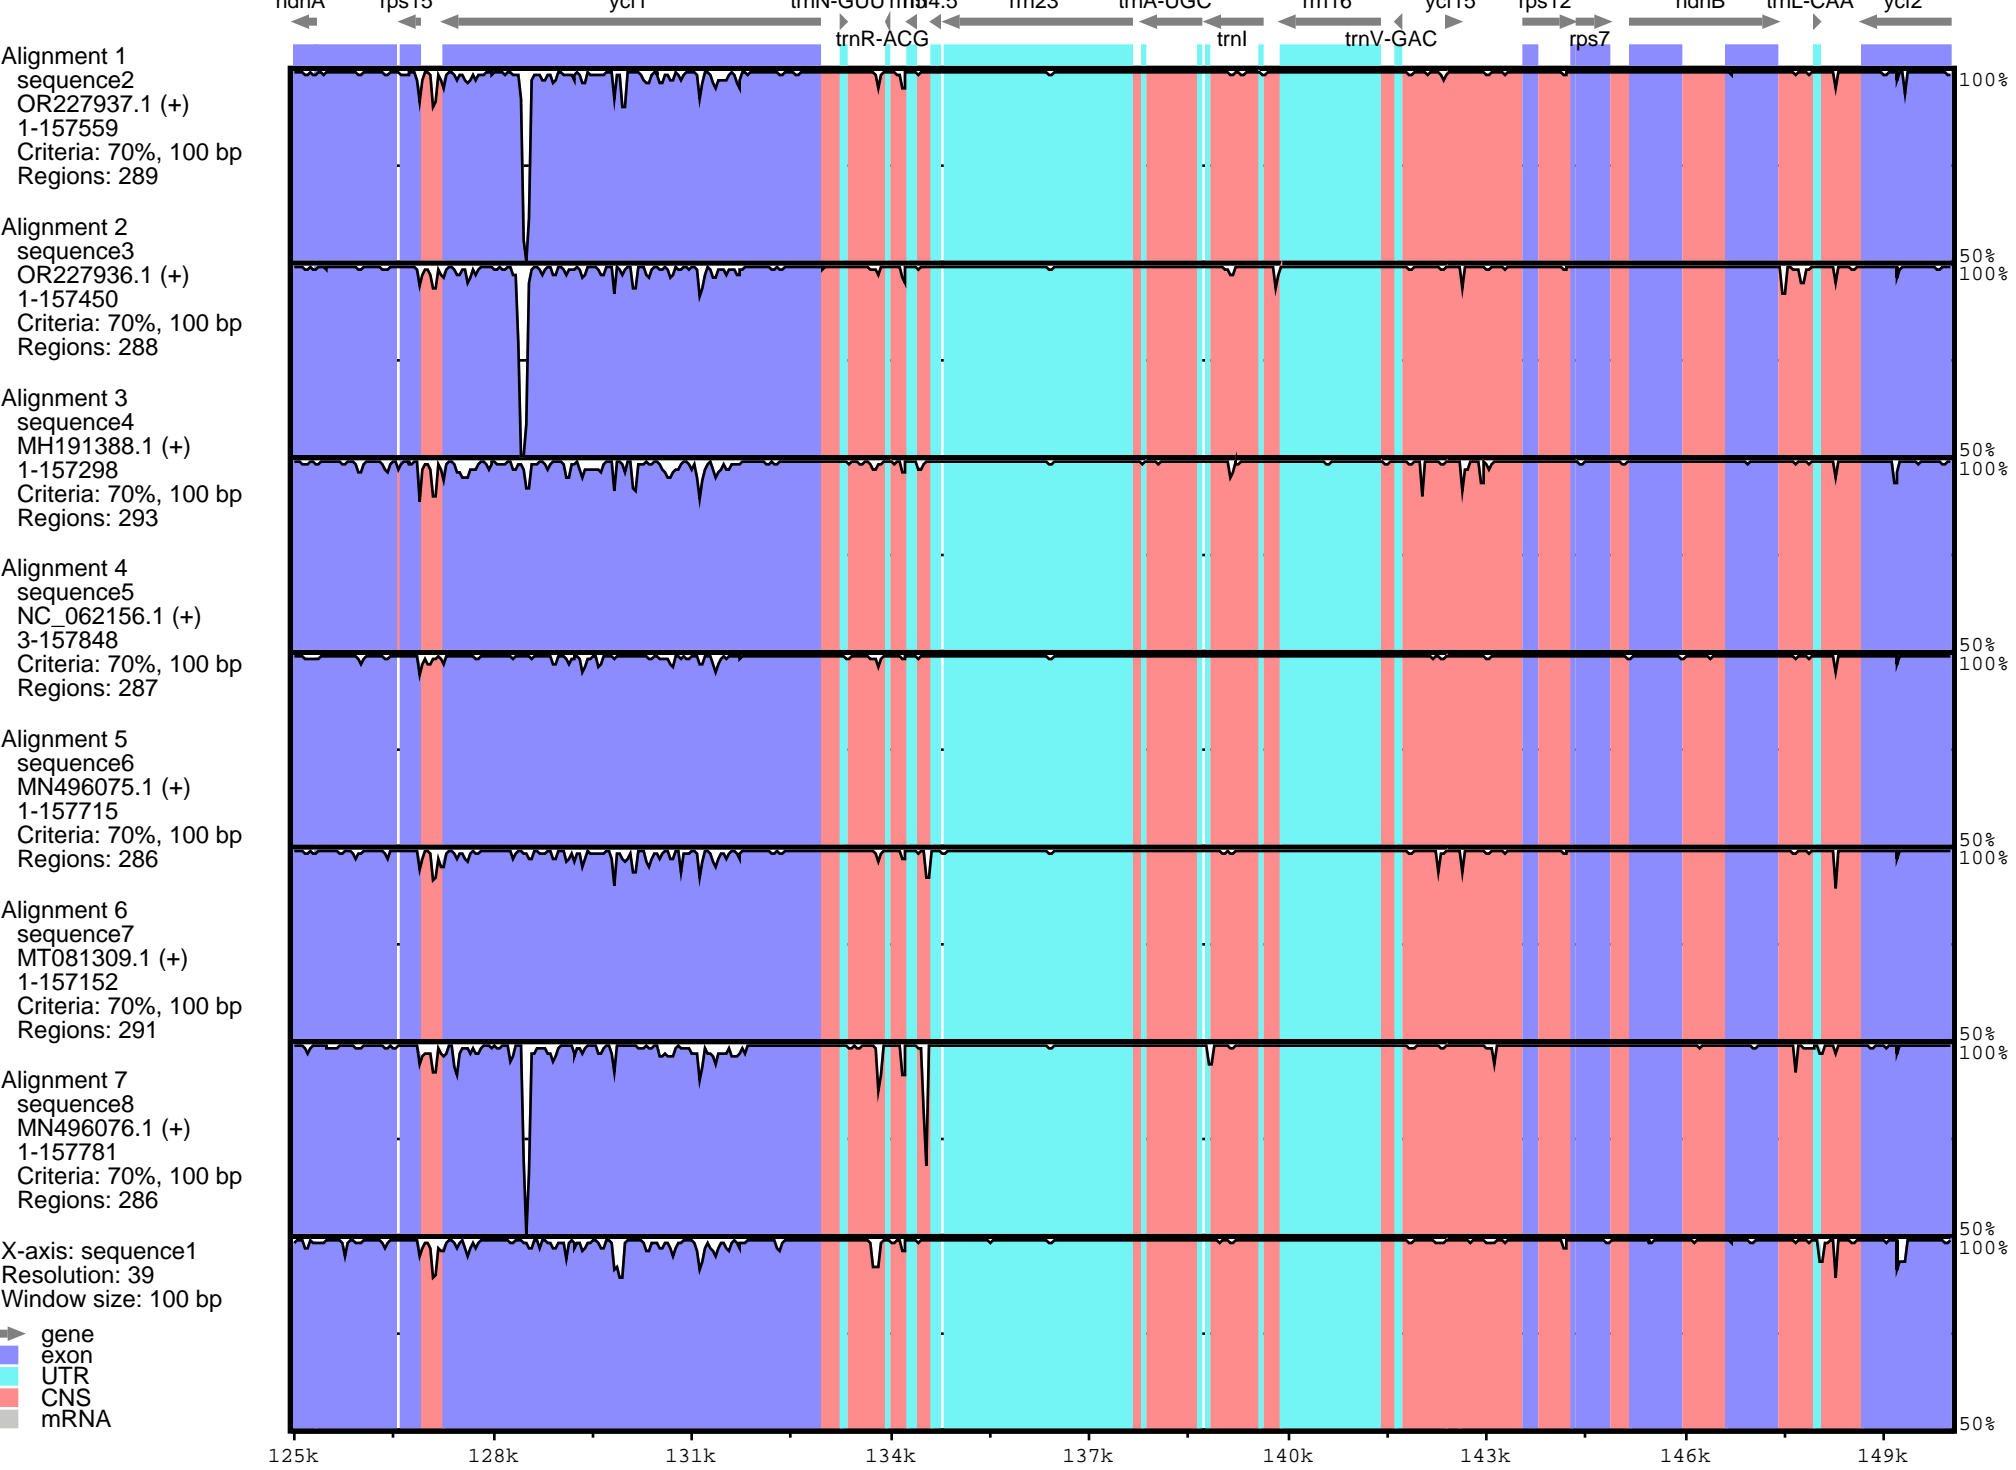

sequence1 OR227935.1:1-157802

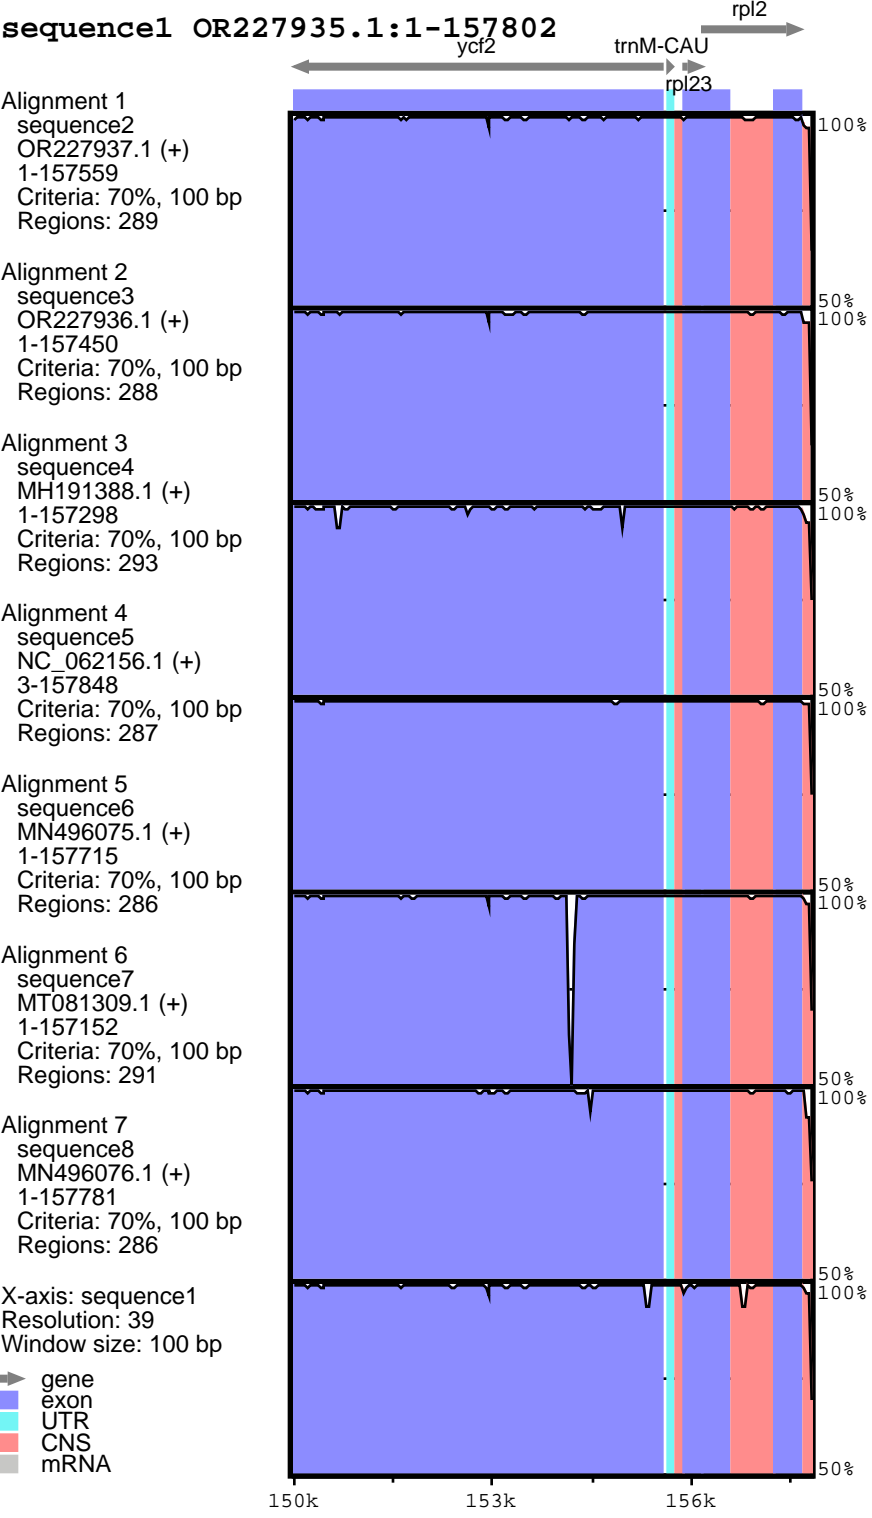

Supplement: s1 [file s1]
